# Supplementary material for: The Union Is Strength: The Synergic Action of Long Fatty Acids and a Bacteriophage against Xanthomonas campestris Biofilm
Source: PubMed Central journal article supplement (PMC7824728; doi:10.3390/microorganisms9010060), 2020-12-28
Supplement: microorganisms-09-00060-s001.pdf [file microorganisms-09-00060-s001.pdf]

# The union is strength: the synergic action of long fatty acids and a bacteriophage against *Xanthomonas campestris* biofilm

Marina Papaiani <sup>1#</sup>, Annarita Ricciardelli <sup>2#</sup>, Angela Casillo <sup>2</sup>, Maria M. Corsaro <sup>2</sup>, Fabio Borbone <sup>2</sup>, Bartolomeo Della Ventura <sup>3</sup>, Raffaele Velotta <sup>3</sup>, Andrea Fulgione <sup>4</sup>, Sheridan L. Woo <sup>5</sup>, Maria L. Tutino <sup>2</sup>, Ermenegilda Parrilli <sup>2\*</sup>, Rosanna Capparelli <sup>1</sup>

<sup>1</sup>Department of Agricultural Sciences, University of Naples Federico II, 80055 Portici, Naples, Italy.

<sup>2</sup>Department of Chemical Sciences, University of Naples Federico II, 80125 Naples, Italy

<sup>3</sup>Department of Physical Sciences, University of Naples Federico II, 80125 Naples, Italy

<sup>4</sup>Istituto Zooprofilattico Sperimentale del Mezzogiorno (IZSM), 80055 Portici, Naples, Italy.

<sup>5</sup>Department of Pharmacy, University of Naples Federico II, 80131 Naples, Italy

# These authors contributed equally to this work

\*Corresponding Author: Ermenegilda Parrilli email: erparril@unina.it

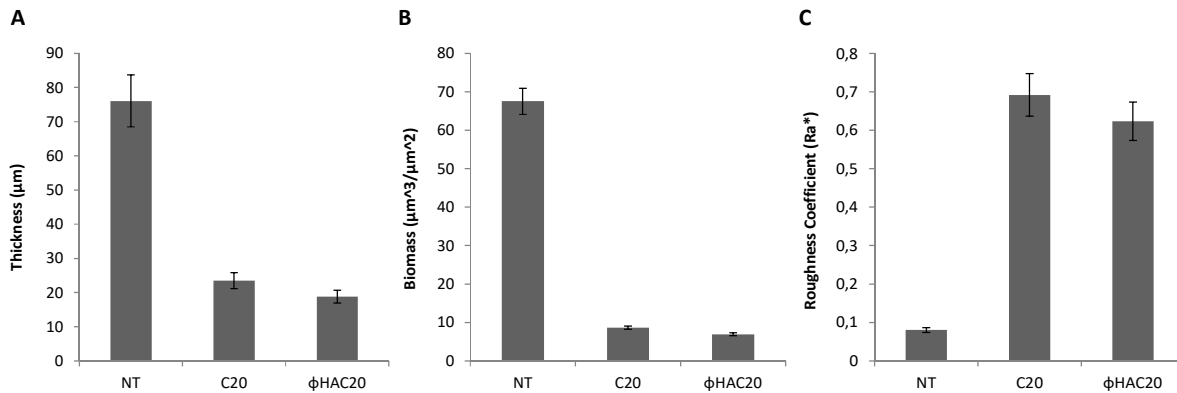

**Figure S1** COMSTAT quantitative analysis of average thickness (A), biomass (B) and roughness coefficient (C) of *Xanthomonas campestris* pv. *campestris* biofilms formed in dynamic conditions in absence and in presence of the C20:0 and the complex φHA+C20.

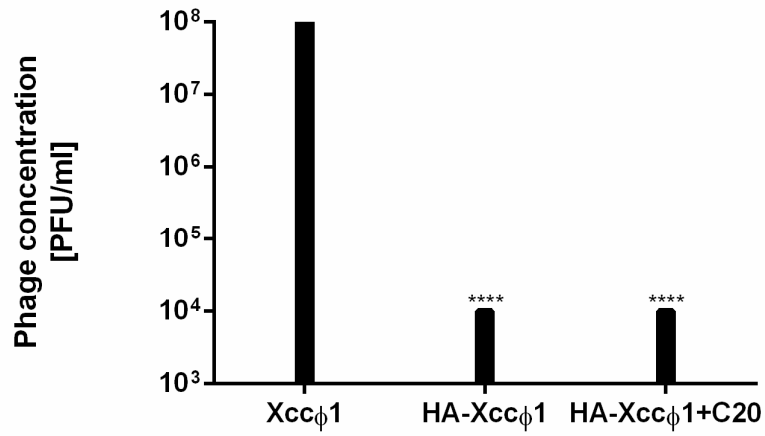

**Figure S2** Analysis of the capacity of the HA to binding Xcc $\phi$ 1 with or without C20:0. Each value is the mean  $\pm$  DS of 3 independent experiments. Statistical analysis was performed with the absorbance compared to the untreated control and considered statistically significant when  $p < 0.05$  (\* $p < 0.05$ , \*\* $p < 0.01$ , \*\*\* $p < 0.001$ , \*\*\*\* $p < 0.0001$ ) according to Two Way Anova Multiple comparisons.

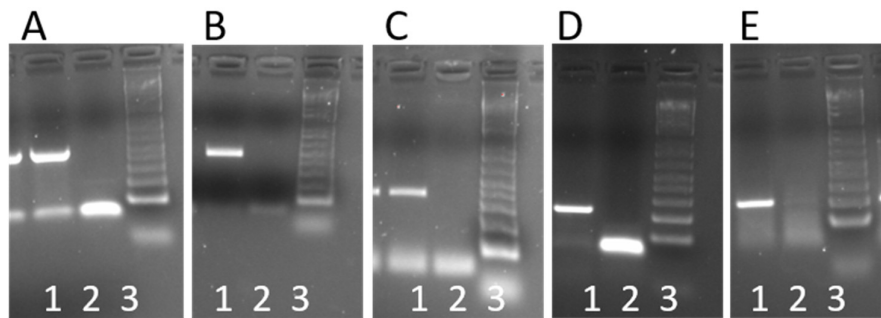

**Figure S3** PCR controls. 1) amplification on DNA to assess the primers functionality; 2) amplification using extracted mRNA as template to verify the absence of genomic DNA in the mRNA preparation; 3) Marker (A) *clp*; (B) *manA*; (C) *rpfF*; (D); *rpoD*.

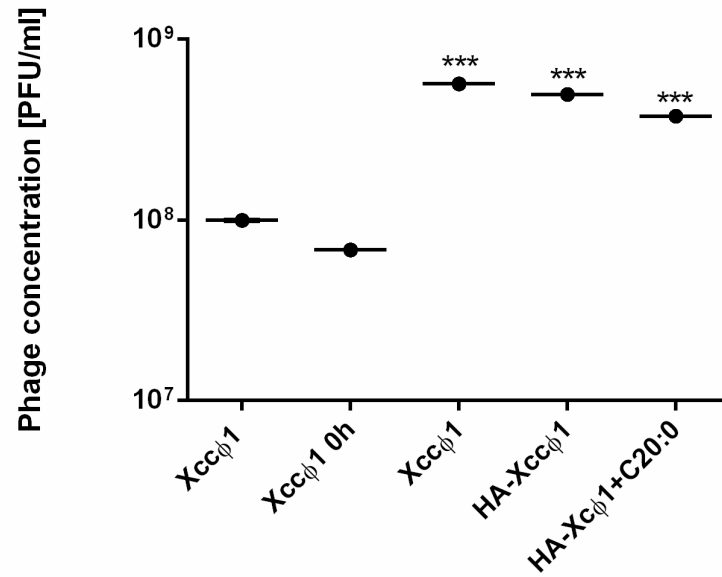

**Figure S4** Analysis of phage concentration on the Xcc biofilm before (0h) and after 6h of treatment with: phage alone (108 PFU/mL), the phage with the HA (108 PFU/mL, and 100 mg/mL, respectively) and the complex HA-Xcc $\phi$ 1 and C20:0. Each value is the mean  $\pm$  DS of 3 independent experiments. Statistical analysis was performed with the phage concentration after the treatment compared to the phage concentration and considered statistically significant when  $p < 0.05$  (\* $p < 0.05$ , \*\* $p < 0.01$ , \*\*\* $p < 0.001$ , \*\*\*\* $p < 0.0001$ ) according to Two Way Anova Multiple comparisons.
